# Supplementary material for: Recurso de casación: Procedencia en el procedimiento de exequatur del Convenio de Bruselas de 1968 (TS 1ª S 245/1999, de 23 marzo)
Source: Springer Nature journal article supplement (doi:10.1186/s12931-017-0628-4), 1999-01-01

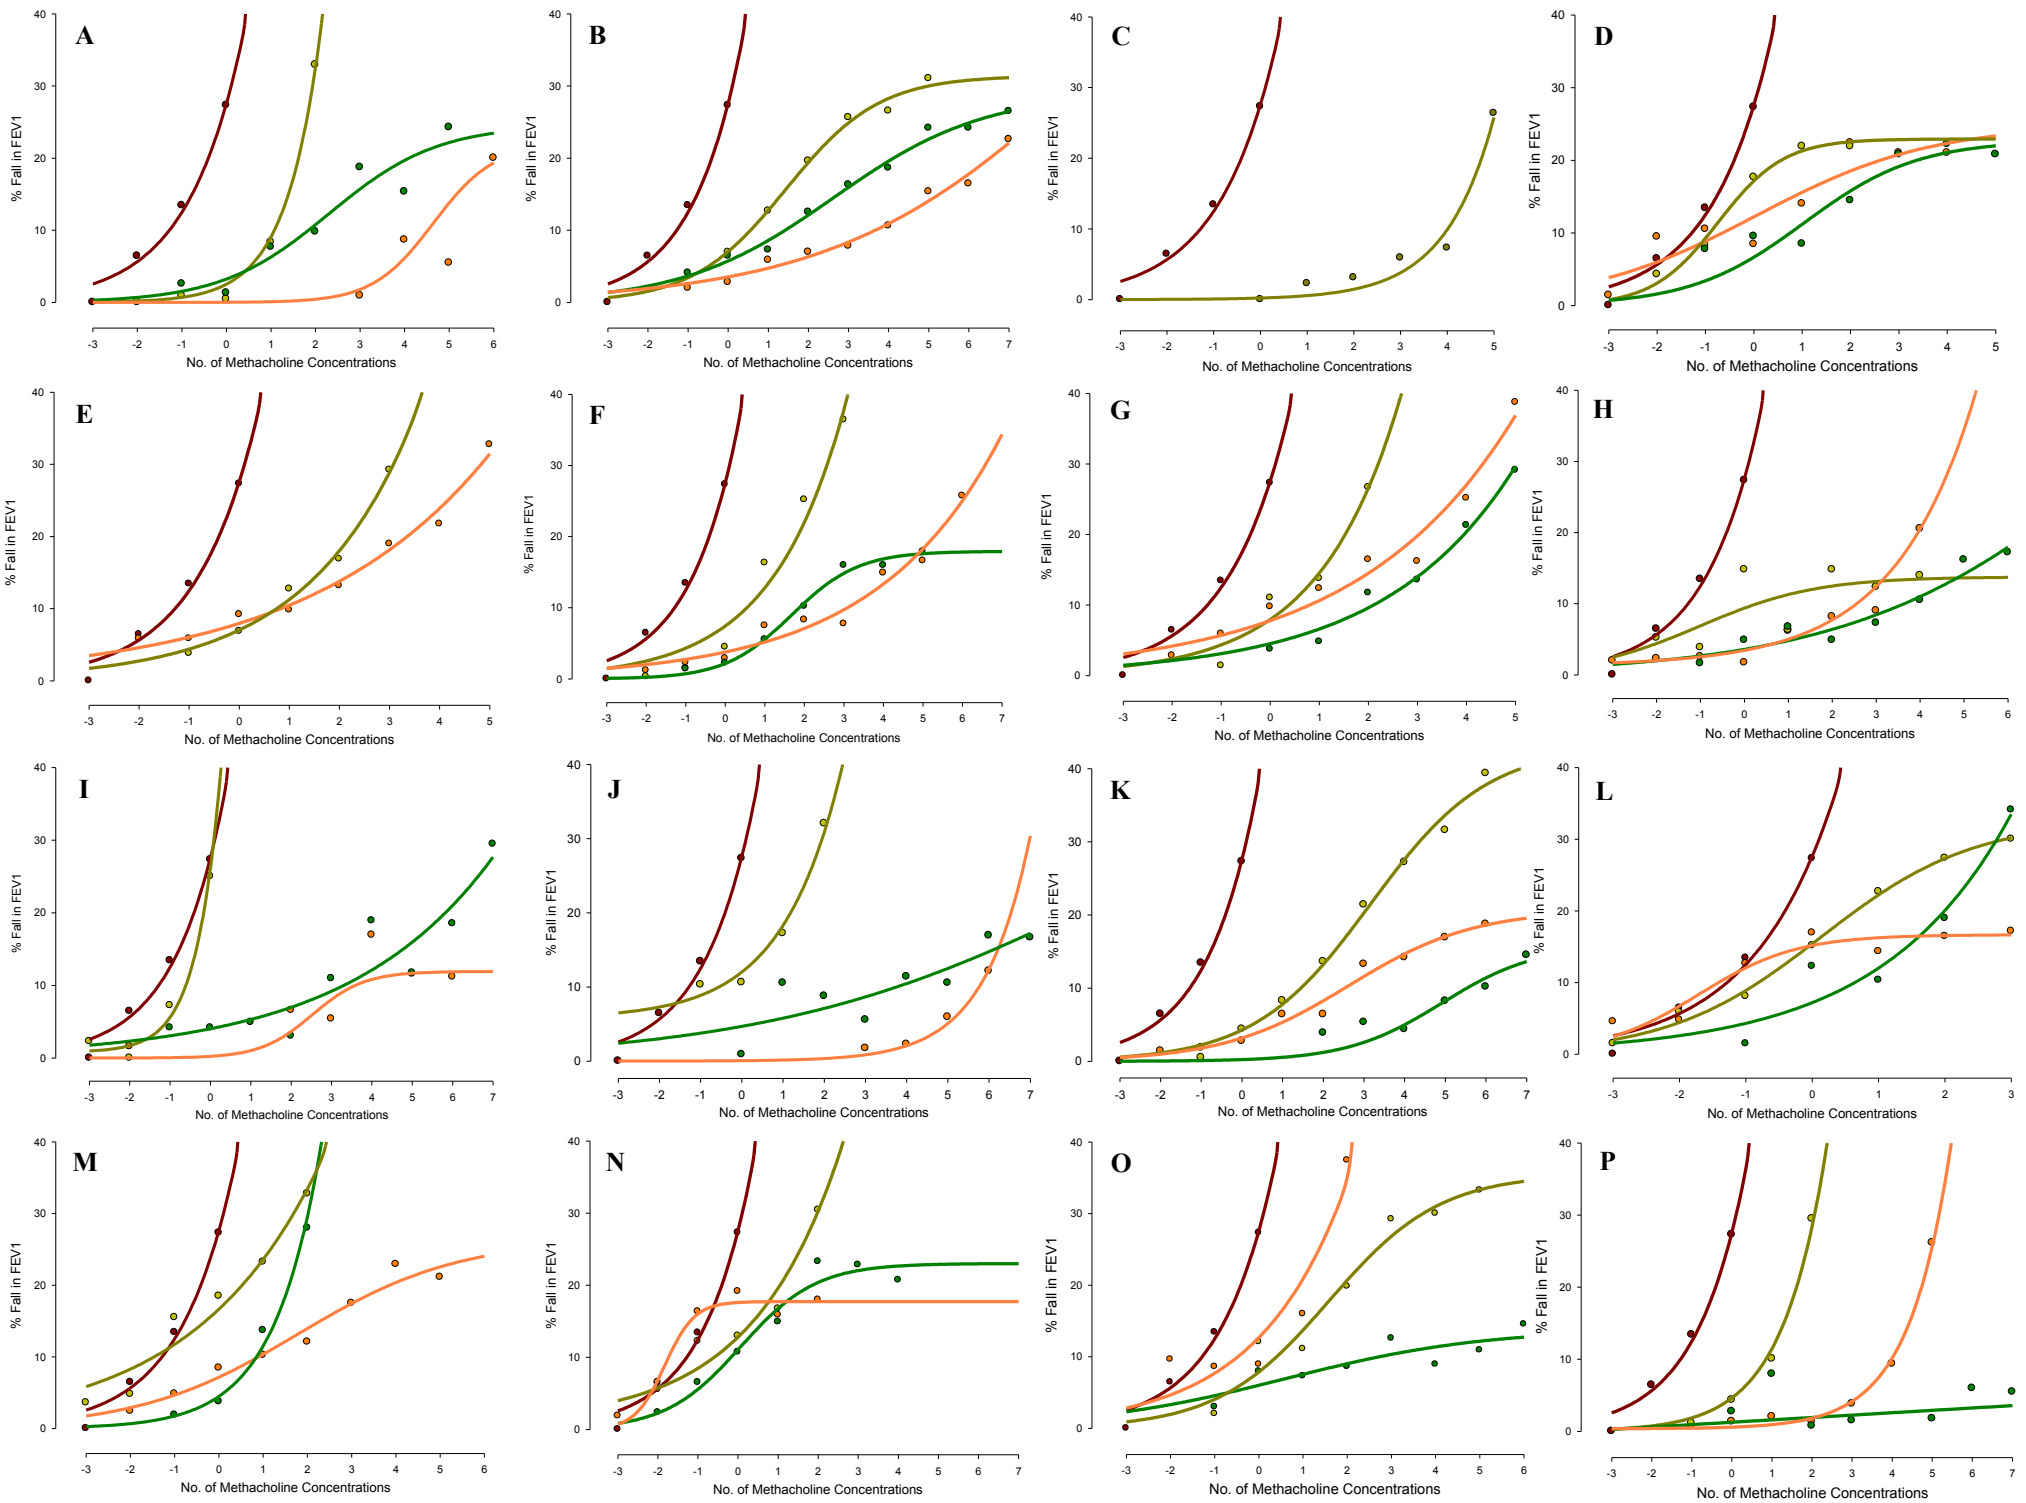

Supplement: MOESM1 [file 13345418]
